# Supplementary material
Source: publisher figshare collection journal article supplement (https://future-science-group.figshare.com/articles/dataset/_/20382396)
Supplement: Supplementary file 1 [file 1]

**Table 4. Biochemical and hematological parameters of laboratory animals in 14 days after infusion with COVID-globulin**

| **Parameter** | **Rats** | | **Rabbits** | |
| --- | --- | --- | --- | --- |
| **COVID-globulin**  **10 %** | **Control** | **COVID-globulin**  **10 %** | **Control** |
| RBC, (1012/L) | 5,37±0,49 | 5,51±0,50 | 5,71±0,54 | 5,62±0,59 |
| HB, (g/L) | 117,40±14,96 | 130,10±15,64 | 112,33±8,94 | 109,50±9,73 |
| Leukocyte, (103/ml) | 9,04±1,86 | 10,17±0,85 | 16,88±2,64 | 17,83±2,67 |
| Lymphocytes (%) | 79,90±4,38 | 75,00±5,19 | 65,17±3,71 | 65,17±3,49 |
| Neutrophils (%) | 19,90±4,31 | 27,00±5,68 | 32,17±4,36 | 32,17±3,66 |
| Eosinophils (%) | 0,10±0,32 | 0,30±0,67 | 0,00±0,00 | 0,17±0,41 |
| Monocytes (%) | 0,10±0,32 | 0,30±0,48 | 2,67±1,21 | 2,50±0,84 |
| Total Protein, (g/L) | 74,50±5,02 | 73,80±5,39 | 65,00±4,10 | 60,83±3,66 |
| Glucose, (mM/L) | 5,00±0,93 | 5,74±1,39 | 4,52±1,00 | 5,16±0,93 |
| AST, (U/L) | 238,25±22,79 | 239,70±29,13 | 55,50±27,19 | 41,67±23,47 |
| ALT, (U/L) | 56,63±12,34 | 54,60±4,62 | 53,25±22,51 | 57,83±11,07 |
| Cholesterol, (mM/L) | 1,91±0,31 | 2,06±0,40 | 0,87±0,39 | 0,70±0,14 |
| Total Bilirubin, (µM/L) | 1,77±0,37 | 1,91±0,60 | 3,94±1,79 | 3,88±1,13 |
| Urea, (mM/L) | 4,71±0,58 | 5,24±0,84 | 3,11±0,60 | 3,04±0,60 |
| Creatinine, (µM/L) | 76,38±7,50 | 78,94±6,46 | 79,37±9,13 | 76,83±5,59 |

There were no significant differences between the experimental and control groups (p>0.05).
