# Supplementary material
Source: publisher figshare collection journal article supplement (https://future-science-group.figshare.com/articles/dataset/_/20382396)

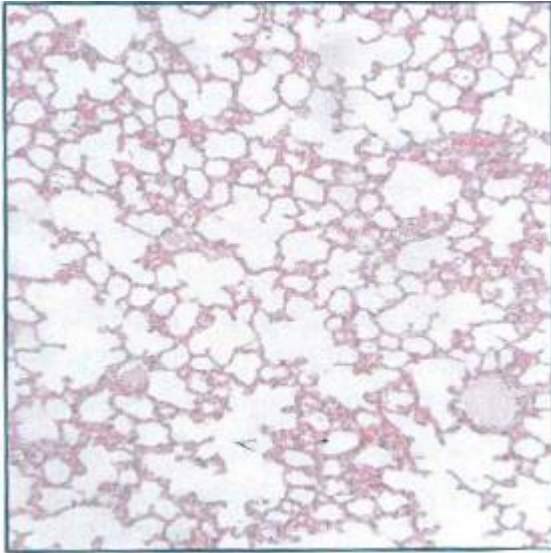

a

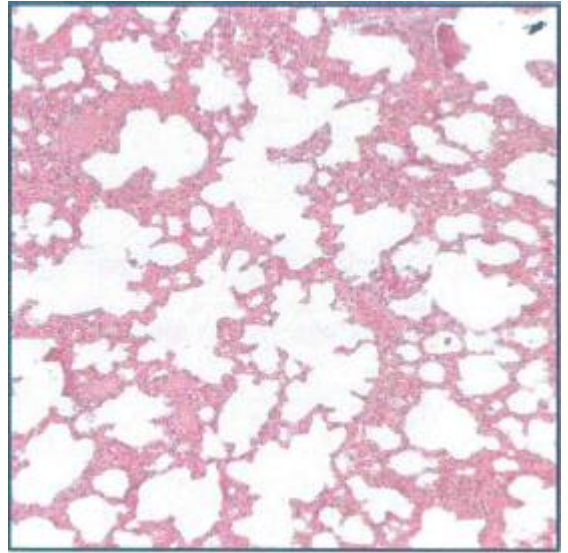

b

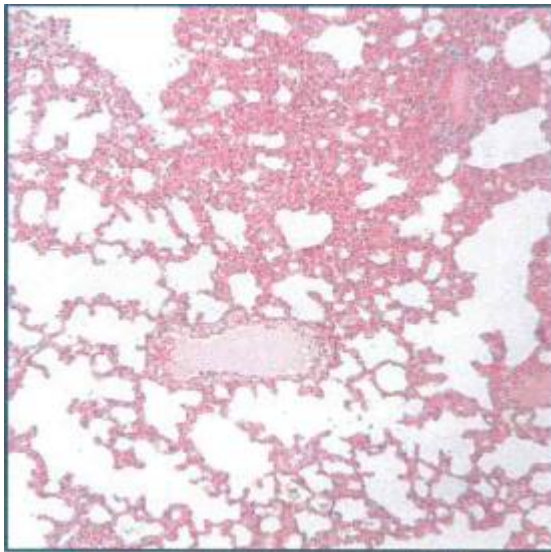

c

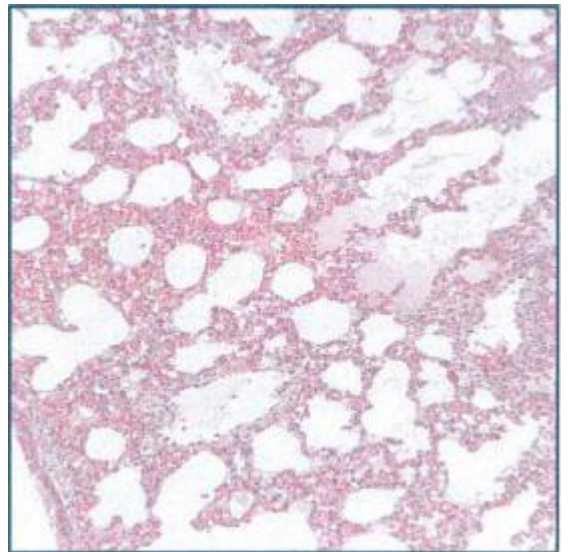

d

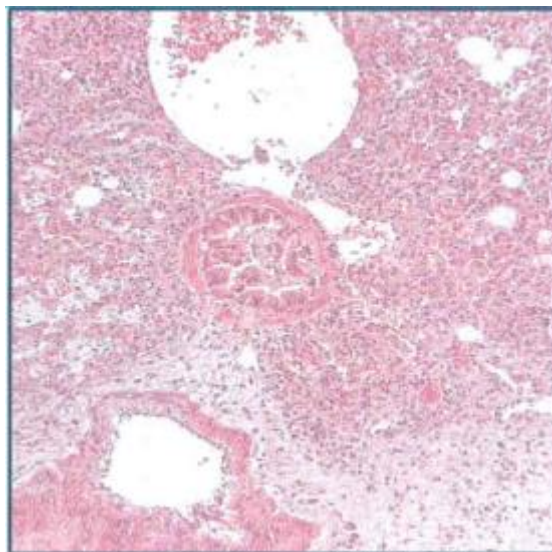

e

Supplement: Supplementary file 1 [file 1]

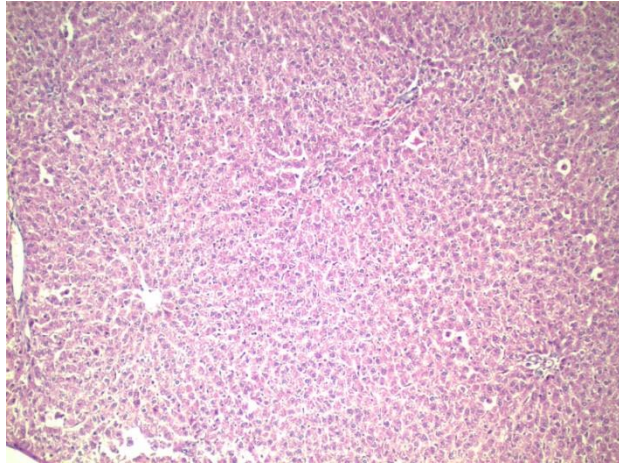

a

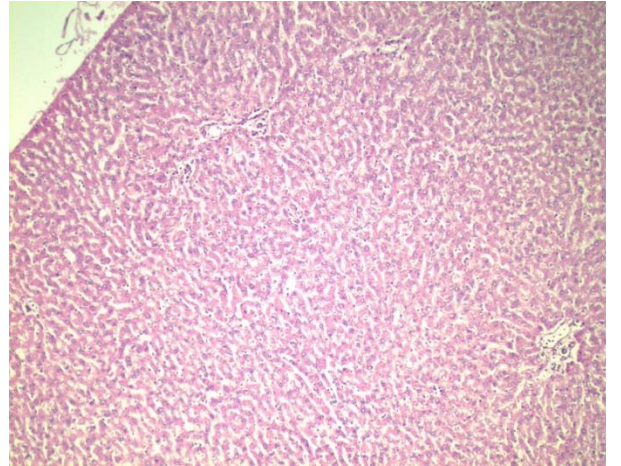

b

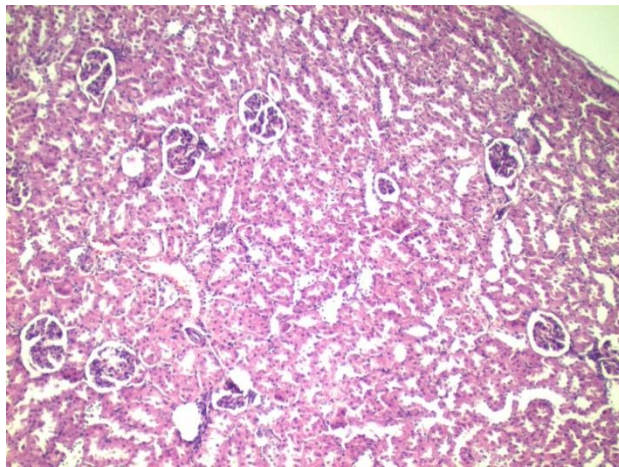

c

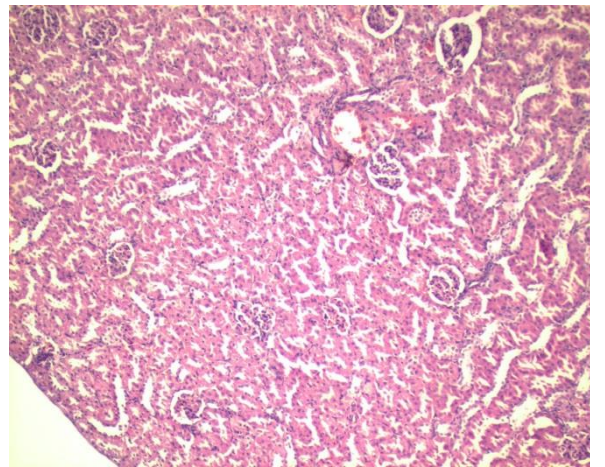

d

Supplement: Supplementary file 2 [file 1]

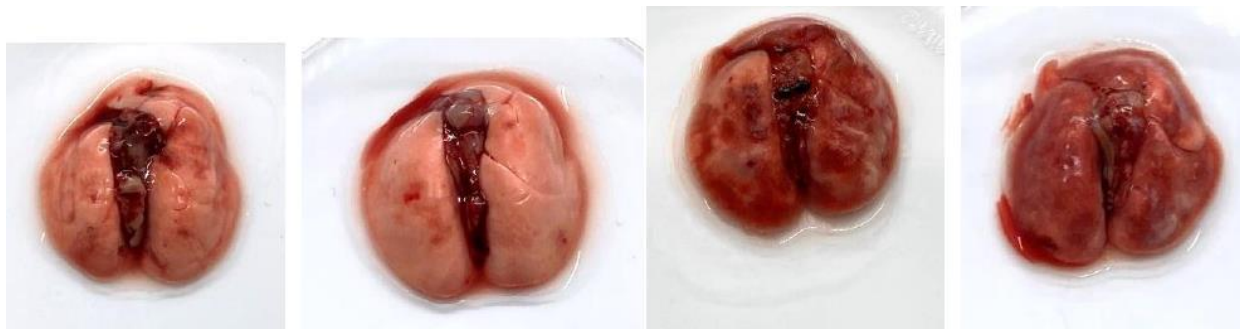

a

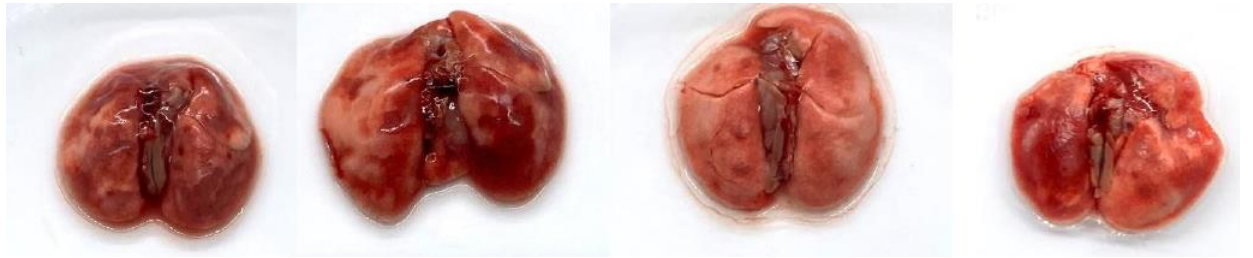

b

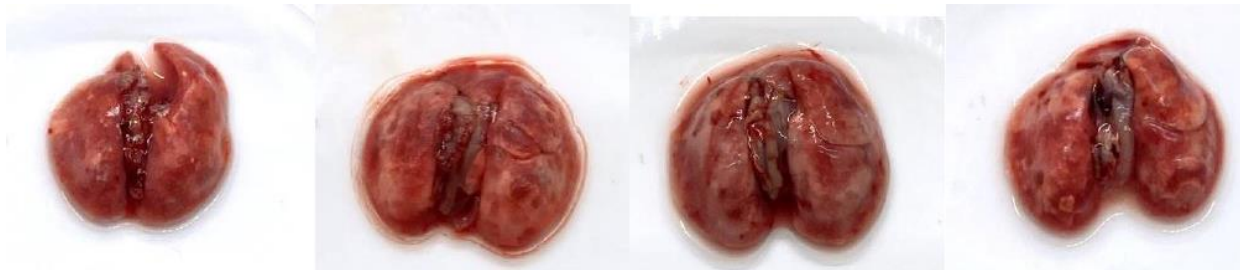

c

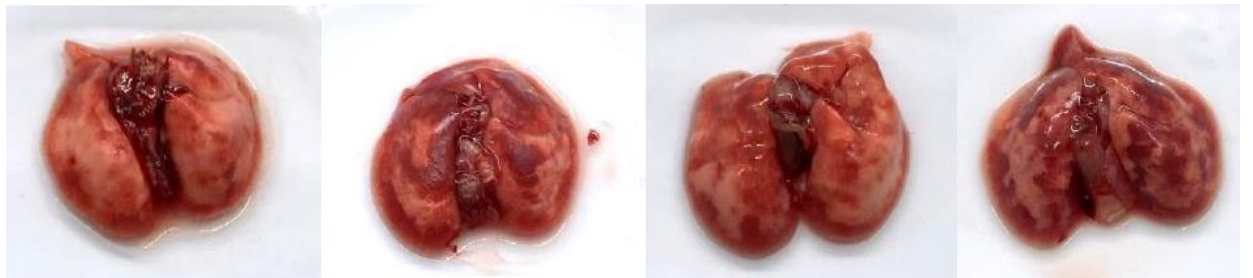

d

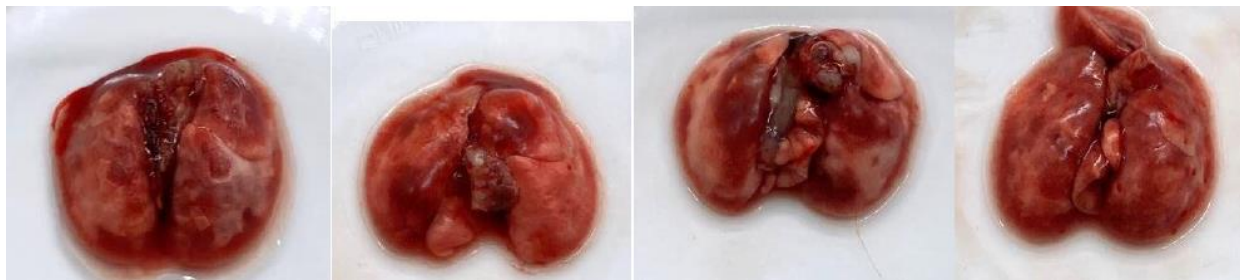

e

Supplement: Supplementary file 3 [file 1]
